# Supplementary material
Source: publisher figshare collection journal article supplement (https://acs.figshare.com/ndownloader/files/5105143)
Supplement: Supplementary file 1 [file 5105143]

# Synthesis of Smooth and Bamboo-like Well-Crystalline CN<sub>x</sub> Nanotubes with Controllable Nitrogen Concentration (x = 0.05~1.02)

Yujie Xiong,<sup>‡,¶</sup> Zhengquan Li,<sup>†</sup> Qixun Guo,<sup>‡</sup> Yi Xie<sup>\*,†,‡</sup>

<sup>†</sup>*School of Chemical and Materials Engineering, Southern Yangtze University, Wuxi, Jiangsu 214036*

<sup>‡</sup>*Nano-materials and Nano-chemistry, Hefei National Laboratory for Physical Sciences at Microscale, University of Science and Technology of China, Hefei, Anhui 230026, P. R. China*

<sup>¶</sup>*Present address: Department of Chemistry, University of Washington, Seattle, WA 98195-1700*

*\*Corresponding author. E-mail: yxielab@ustc.edu.cn*

**Table S1:** A) The typical morphologies and x values of the as-obtained  $\text{CN}_x$  products by adding different amounts of reagents.

| $\text{CO}(\text{NH}_2)_2$ | Adding amount of reagents |                 |                                 |        | x value<br>of $\text{CN}_x$ | Morphology<br>of NTs | Figure<br>No. |
|----------------------------|---------------------------|-----------------|---------------------------------|--------|-----------------------------|----------------------|---------------|
|                            | $\text{NaN}_3$            | $\text{NaNH}_2$ | $\text{C}_2\text{H}_5\text{OH}$ | Mg     |                             |                      |               |
| 3.10 g                     | 2.00 g                    | —               | —                               | 2.05 g | 1.02                        | Smooth               | 1             |
| 3.10 g                     | 1.10 g                    | —               | —                               | 2.05 g | 0.52                        | Smooth               | S2            |
| 3.10 g                     | —                         | 3.00 g          | —                               | 2.05 g | 1.01                        | Bamboo-like          | 3             |
| 3.10 g                     | —                         | 1.65 g          | —                               | 2.05 g | 0.49                        | Bamboo-like          | S3            |
| 3.10 g                     | —                         | —               | —                               | 2.05 g | 0.08                        | Smooth               | S4            |
| 3.10 g                     | —                         | —               | 2 mL                            | 2.05 g | 0.05                        | Smooth               | S5            |

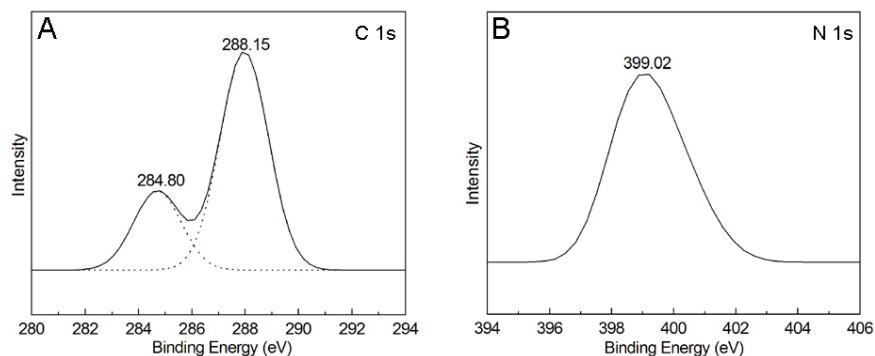

**Figure S1.** (A) C1s XPS peaks and (B) N1s XPS peaks of the sample obtained by adding 2.00 g  $\text{NaN}_3$ . XPS measurements indicate that the C1s (Figure S1A) and N1s (Figure S1B) binding energies of the sample are 288.15 and 399.02 eV, respectively, which can be attributed to  $\text{sp}^2$  C and  $\text{sp}^2$  N in atomic structure of graphite-like CN. The observed C1s and N1s binding energies are very similar to C-N bonds of graphite-like CN (Alba de Sánchez, N.; Carrasco, C.; Prieto, P. *Physica B* **2003**, 337, 318).

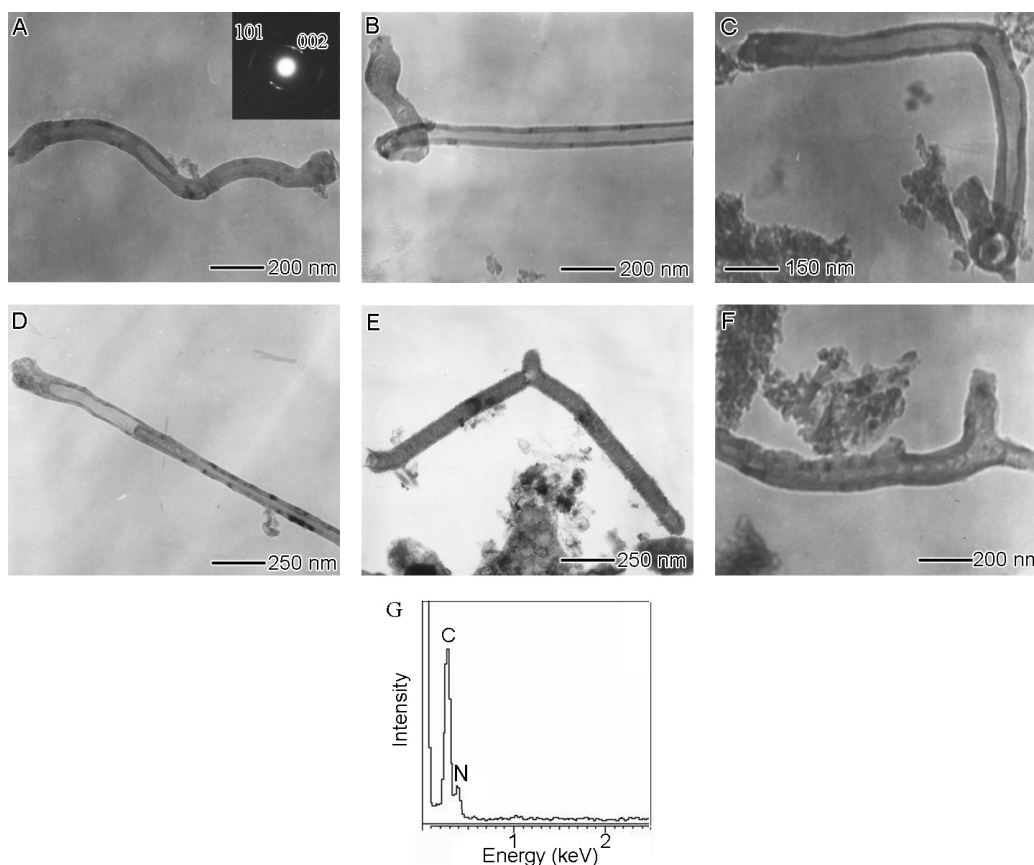

**Figure S2.** (A)-(C) TEM images and ED pattern of smooth  $\text{CN}_{0.52}$  NTs with large bending angles synthesized by adding 1.10 g  $\text{NaN}_3$ . (D) TEM images of subdivided  $\text{CN}_{0.52}$  NTs synthesized by adding 1.10 g  $\text{NaN}_3$ . (E), (F) TEM images of Y-structural  $\text{CN}_{0.52}$  NTs synthesized by adding 1.10 g  $\text{NaN}_3$ . (G) EDX spectrum of  $\text{CN}_{0.52}$  NTs synthesized by adding 1.10 g  $\text{NaN}_3$ . By changing the adding amount of sodium azide, the nitrogen concentration of smooth  $\text{CN}_x$  NTs (i.e., the value of  $x$ ) can be continuously adjusted. For example, the  $\text{CN}_{0.52}$  NTs were also prepared by adding half amount of sodium azide. It was found that the  $\text{CN}_x$  NTs with lower nitrogen concentration have similar properties with carbon NTs. As examples, many  $\text{CN}_{0.52}$  NTs with large bending angles (Figure S2A-C) were observed; there also exist some Y-structural (Figure S2D) and subdivided NTs (Figure S3E and F) in the products. The nitrogen concentration was determined by EDX (Figure 2G) and elemental analysis measurements.

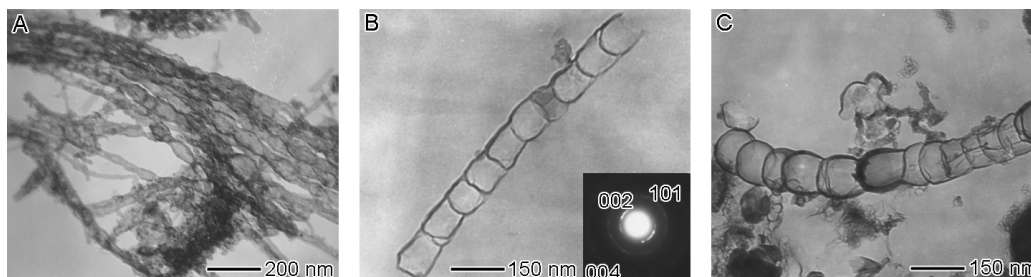

**Figure S3.** TEM images and ED pattern of bamboo-like  $\text{CN}_{0.49}$  NTs prepared by adding 1.65 g  $\text{NaNH}_2$ . The nitrogen concentration of bamboo-like  $\text{CN}_x$  NTs can be continuously adjusted by changing the adding amount of sodium amide. For example, bamboo-like  $\text{CN}_{0.49}$  NTs were obtained by adding half amount of sodium amide.

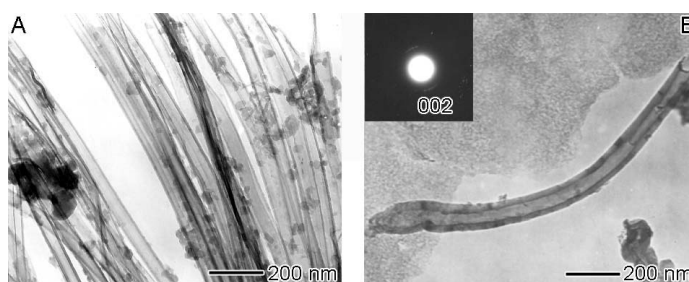

**Figure S4.** TEM images and ED pattern of smooth  $\text{CN}_{0.08}$  NTs obtained from the reaction between Mg and  $\text{CO}(\text{NH}_2)_2$ . A sealed reaction between urea ( $\text{CO}(\text{NH}_2)_2$ ) and metal magnesium (Mg) at 550~600 °C could produce smooth  $\text{CN}_x$  ( $x \approx 0.08$ ) NTs. It indicates that the urea could act as both carbon and nitrogen source in the reactions.

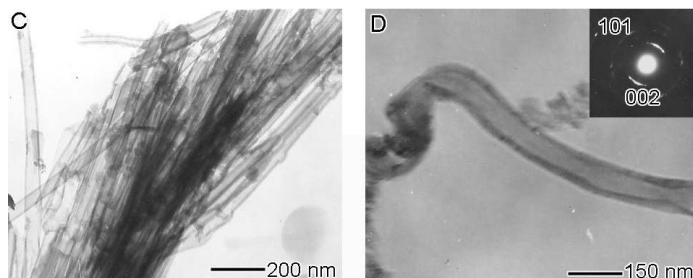

**Figure S5.** TEM images and ED pattern of smooth  $\text{CN}_{0.05}$  NTs prepared by adding 2 mL  $\text{C}_2\text{H}_5\text{OH}$ . With  $x$  value below 0.08, the nitrogen concentration can be controlled by introducing carbon source of ethanol ( $\text{C}_2\text{H}_5\text{OH}$ ). As a typical case, Figure S5 shows TEM images of smooth  $\text{CN}_{0.05}$  NTs obtained by introducing 2 mL ethanol.

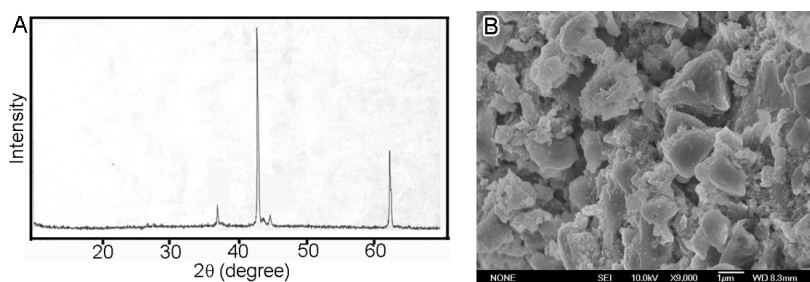

**Figure S6.** (A) XRD pattern and (B) FE-SEM image of the as-obtained product from the reactions of 2.05 g metal magnesium ( $\text{Mg}$ ), 3.10 g urea ( $\text{CO}(\text{NH}_2)_2$ ) and 3.40 g sodium azide ( $\text{NaN}_3$ ). The elemental analysis results show that the N/C ratio of the product from the reactions of 2.05 g metal magnesium ( $\text{Mg}$ ), 3.10 g urea ( $\text{CO}(\text{NH}_2)_2$ ) and 3.40 g sodium azide ( $\text{NaN}_3$ ) is 1.34, which is good agreement with the  $\text{C}_3\text{N}_4$  stoichiometry. The XRD pattern (Figure S6A) of the product cannot be precisely indexed to any phase of  $\text{C}_3\text{N}_4$ . Some of the diffraction peaks are similar to those of  $\alpha\text{-C}_3\text{N}_4$  and  $\beta\text{-C}_3\text{N}_4$ , however, the strongest peaks of these two phases cannot be found in the obtained pattern. Totally, the product is impossible to be graphitic- $\text{C}_3\text{N}_4$ , since the (002) peak cannot be observed in the pattern. The FE-SEM image (Figure S6B) of the product shows that the product is composed of some sub-microcrystals.

**Instrumentation.** FE-SEM images and EDX spectra were taken on a JEOL JSM-6700 SEM. TEM images and ED patterns were taken on a Hitachi Model H-800 instrument with a tungsten filament using an accelerating voltage of 200 kV. HRTEM images and ED patterns were recorded on a JEOL-2010 TEM at an acceleration voltage of 200 KV. Element analysis was taken on an ELEMENTAR VARIO EL-III elemental analyzer. XRD patterns were performed on a Mac Science MXPAHF rotating anode X-ray diffractometer with Cu K $\alpha$  radiation ( $\lambda = 1.54178 \text{ \AA}$ ). XPS spectra were collected on an ESCALab MKII X-ray photoelectron spectrometer, using nonmonochromatized Mg-KII X-ray as the excitation source.
